# Supplementary material
Source: ML conference proceedings conference paper supplement (https://openaccess.thecvf.com/content/ICCV_2017/html/Xue_Catadioptric_HyperSpectral_Light_ICCV_2017_paper.html)
Supplement: Supplementary file 1 [file Xue_Catadioptric_HyperSpectral_Light_ICCV_2017_supplemental.pdf]

Archive with 2 entries (2 files):
- readme.txt
- iccv580suppplementary.avi
