# Supplementary material
Source: ML conference proceedings conference paper supplement (https://openaccess.thecvf.com/content/ICCV_2017/html/Xue_Catadioptric_HyperSpectral_Light_ICCV_2017_paper.html)
Supplement: Supplementary file 1 [file Xue_Catadioptric_HyperSpectral_Light_ICCV_2017_supplemental.pdf › readme.txt]

Supplementary material for ICCV submission ID 580

iccv580supplementary.avi (codec: DivX) introduces the proposed snapshot hyperspectral light field imager in ICCV submission (ID 580).
